# Supplementary material
Source: PubMed Central journal article supplement (PMC3448286)
Supplement: NIHMS397891-supplement-2.pdf [file NIHMS397891-supplement-2.pdf]

## Supplementary Note 6: Numerical Validation

### a) Numerical Tests for Surface Diffusion

A series of numerical test is conducted to assess the performance of the surface diffusion on a cubic grid. We use the test suggested in [1].

#### Diffusion on a sphere

The following asymmetric solution

$$C(\theta, \psi, t) = 2 + \frac{1}{2}e^{-2t} \cos \psi \sin \theta + e^{-6t} \cos 2\psi \sin^2 \theta + e^{-12t} \cos 3\psi \sin^3 \theta \quad (1)$$

of the diffusion equation

$$\frac{\partial C}{\partial t} = \frac{1}{\sin \theta} \frac{\partial}{\partial \theta} \left( \sin \theta \frac{\partial C}{\partial \theta} \right) + \frac{1}{\sin^2 \theta} \frac{\partial^2 C}{\partial \theta^2}$$

on a unit sphere will be used as a reference for comparisons with the numerical algorithm.

The initial condition of the numerical solution is constructed by populating each surface element with a concentration given by  $C(\theta_c, \psi_c, t)$ , where  $\theta_c$  and  $\psi_c$  are the position of the center of a surface element in spherical coordinates.

We assess the performance of the method by running the simulation using resolutions ranging from 5 to 157 grid elements with side length  $h$  for the diameter of the sphere. Additionally the distance  $\Delta k$  between surface elements used to estimate the local curvature is varied between 2 and 39. Each simulation is integrated until  $t = 1$ .

**Supplementary Figure 9** shows the largest relative error that occurred over the course of the individual simulations as a function of the diameter of the sphere measured in grid elements. Symbols with common shapes and colors represent simulations with common distance  $\Delta k$  used for estimating the local curvature. The maximum error shows two distinct behaviors for a given distance  $\Delta k$ , for small numbers of grid elements, i.e. large grid constants, reductions of the grid constants lead to a reduction of the error following a power law. However, this relation only holds up until a certain  $\Delta k$  dependent grid size.

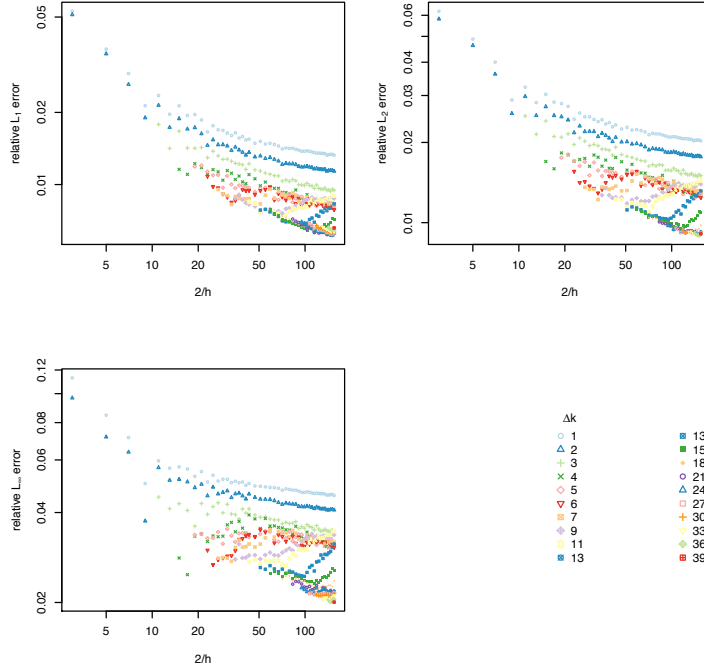

Supplementary Figure 9: Maximum relative error in  $L_1$ ,  $L_2$  and  $L_\infty$  norm as a function of the grid size used in the simulation. Symbol shapes and colors indicate the distance  $\Delta k$  used for curvature estimation.

For smaller grid constants the errors do either decrease with a smaller power or begin to oscillate. Thus in order to take advantage of larger grid sizes  $\Delta k$  has to be adapted. Comparing the different error norms shows no qualitative difference between these norms.

**Supplementary Figure 10** shows the time dependence of the mean square error for simulations with different grid constants and step sizes. The initial condition is set up to match the analytic solution exactly, which leads to a sharp rise of the error at the beginning of the simulation. Local discretization errors in regions with high concentration gradients lead to an initial growth of the error. These error terms are dissipated over time by the diffusion, while discretization errors contribute less to the error of the solution due to shallower concentration gradients, which is reflected by the decreasing error as the simulations continue.

**Supplementary Figure 11(a)** illustrates the dependence of the maximum  $L_2$  error of a simulation on the step size  $\Delta k$  for a mid-resolution simulation. For small  $\Delta k$  an increase of the step size leads to a decrease of the maximum  $L_2$  error of a simulation, however for step sizes larger than a grid constant

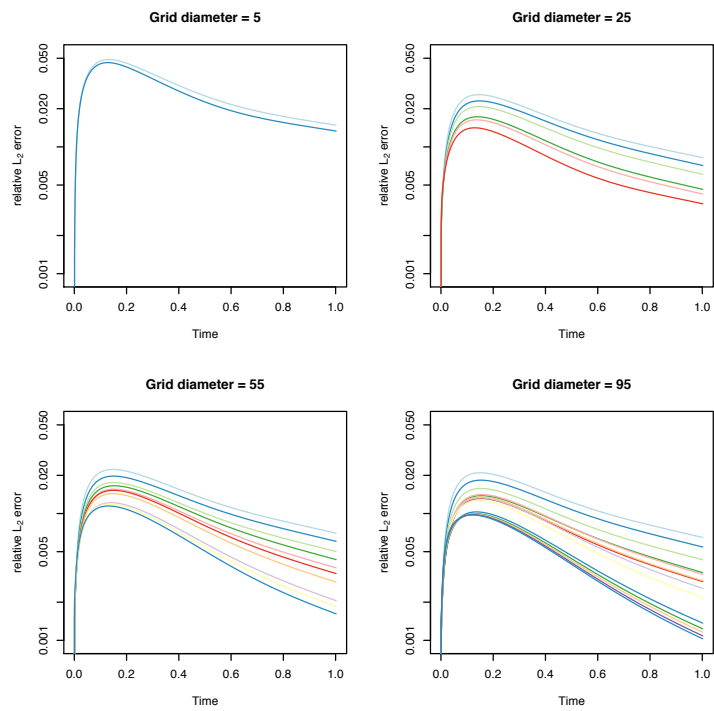

Supplementary Figure 10: Relative error in  $L_2$  norm as a function of time. Line colors indicate the distance  $\Delta k$  used for curvature estimation.

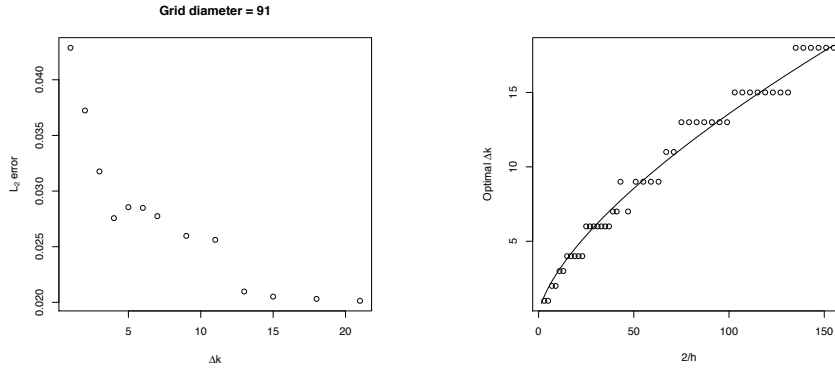

(a) Effect of increasing the distance  $\Delta k$  for a given grid diameter.

(b) Optimal choice of the distance  $\Delta k$  for varying grid diameters. Points indicate results from numerical experiments, the solid line shows the theoretical optimum  $\Delta k = h^{-2/3}$

Supplementary Figure 11: Step size  $\Delta k$  affects the simulation performance.

dependent threshold the error will begin to oscillate with further increases of the step size  $\Delta k$ .

The optimal step size  $\Delta k$  for estimating the local surface curvature is given in [1] as  $\Delta k = h^{-2/3}$ . Since  $h$  can be interpreted as the inverse radius of the sphere in grid constants we can estimate the optimal value of  $\Delta k$  for arbitrary shapes by defining the scale at which a sphere of a given radius is optimally sampled. **Supplementary Figure 11(b)** shows the optimal  $\Delta k$  obtained in numerical experiments. Values of  $\Delta k$  at a given grid constant are assessed by comparing the largest relative  $L_2$  error that occurred in each simulation. A naive approach to choose the optimal value would be to pick the  $\Delta k$  for which the maximum error occurring during a simulation is smallest. However, **Supplementary Figure 11(a)** shows that the error is nearly independent from the step size after a certain threshold is exceeded. This weak complex dependency of the error on  $\Delta k$  and the grid constant can be considered noise for all practical purposes. Therefore, a value  $\Delta k$  is considered optimal if it is the smallest  $\Delta k$  that has an associated  $L_2$  error that is within 10% of the smallest observed error.

**Supplementary Figure 13** illustrates the effect of the local adaption procedure on the geometry of the sphere. As described in the main text and **Supplementary Note 3d**, the geometry of the surface of the cubic grid is adapted to approximate a curved surface. The visualizations in **Supplementary Figure 13** rely on surface normals, which are derived from the adapted geometry, as an input to the shading model that illuminates the visualization. The vertex normals that enter the shading model itself are the average of the surface normals

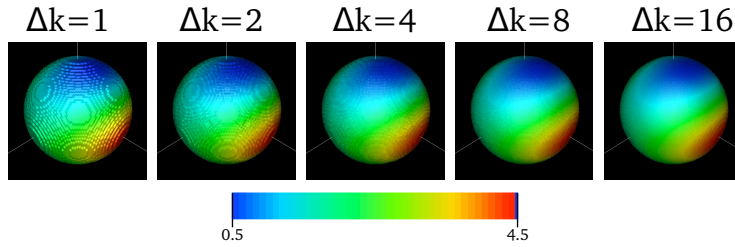

Supplementary Figure 13: Visualization of the effect of increasing step size  $\Delta k$ . The heatmap shows the concentration in arbitrary units.

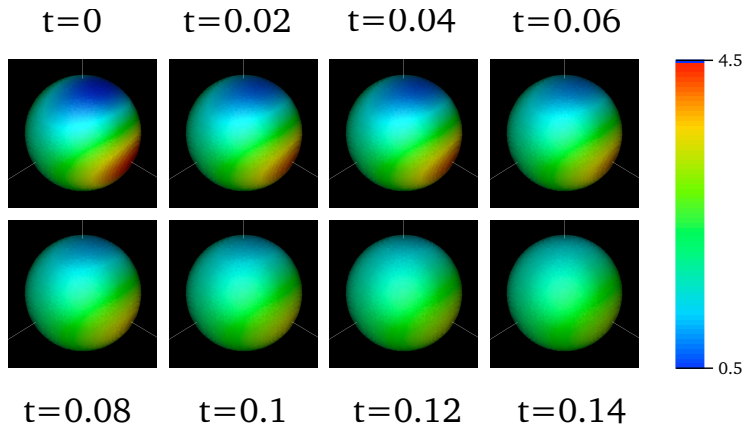

Supplementary Figure 14: Visualization of the simulation used to test the accuracy of the numerical solution of the diffusion equations. The heatmap shows the concentration in arbitrary units.

of the surfaces sharing the vertex under consideration.

**Supplementary Figure 14** visualizes the numerical solution of the diffusion equation with the initial conditions given by the solution (Equation 1) for  $t = 0$ . The method of interpolating the surface normals described above is employed here as well.

**Supplementary Figure 15** shows the magnitude of the local relative error for simulations with varying resolution. As most changes to the error occur during the first half of the simulation the error is only shown up till  $t = 0.4$ . The viewpoint corresponds to Figure 14, comparing the solution with the error, it becomes obvious that the largest errors occur in the regions with the steepest gradients. As the gradients become shallower the magnitude of the error decreases.

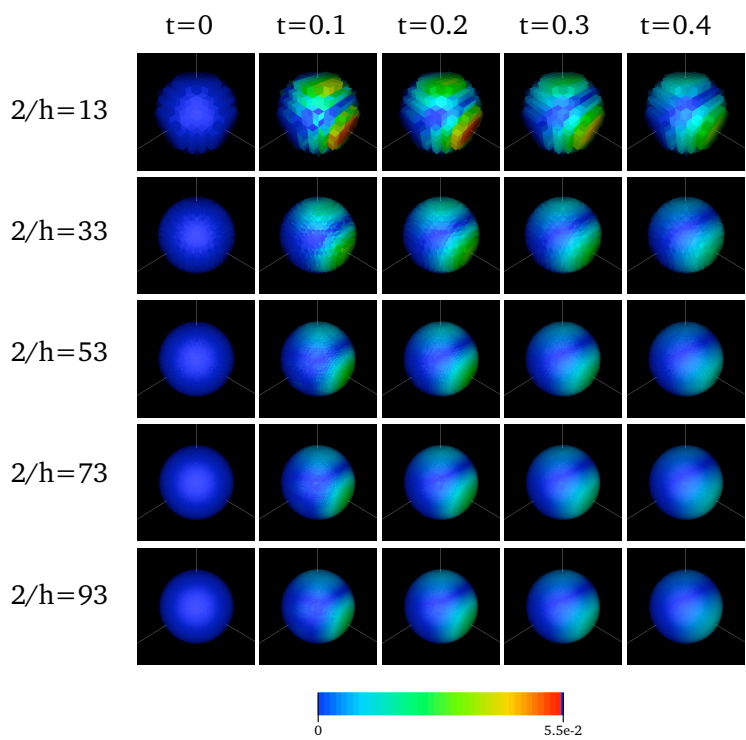

Supplementary Figure 15: Visualization of distribution of the relative error.

## References

- [1] I. L. Novak, F. Gao, Y.-S. Choi, D. Resasco, J. C. Schaff, B. M. Slepchenko, *Diffusion on a Curved Surface Coupled to Diffusion in the Volume: Application to Cell Biology.*, J Comput Phys. 2007 Oct 1;226(2):1271-1290.

## b) Numerical Tests for 3-Dimensional (Bulk) Diffusion

We test the accuracy of the 3-dimensional (bulk) diffusion algorithms in Simmune by using the analytical solution of the diffusion equation on a box with no flux boundary conditions, a side length  $L$  and a diffusing particle with diffusion constant  $D$ .

$$c(t, x, y, z) = \sum_{i,j,k=0}^{\infty} a_{ijk} \cos\left(\frac{i\pi x}{L}\right) \cos\left(\frac{j\pi y}{L}\right) \cos\left(\frac{k\pi z}{L}\right) \cdot \exp\left(-Dt \left(\left(\frac{i\pi}{L}\right)^2 + \left(\frac{j\pi}{L}\right)^2 + \left(\frac{k\pi}{L}\right)^2\right)\right) \quad (1)$$

We set the side length of the box to  $L = 15 \mu m$ , and choose a rather conservative value for the diffusion constant of  $D = 10^{-12} \frac{m^2}{s}$ , describing the slow diffusion of a large scaffold protein complex. In order to produce biologically plausible concentration fields we assume that the coefficient  $a_{ijk} = 0$  for all  $i, j$  or  $k$  larger than 3. The coefficient  $a_{000}$  determines the average concentration, which we set to  $0.4 \mu mol/l$ . All other coefficients are set to

$$a_{ijk} = \rho \frac{10^{-8}}{i + j + k + 1},$$

where  $\rho \in \{0 \dots 5\}$  is an integer drawn from a uniform random distribution. The factor  $(i + j + k + 1)^{-1}$  is introduced to suppress highly oscillating components leading to unrealistically steep gradients in the initial distribution of the diffusing molecule.

In order to get a better understanding of the concentration distributions used in this analysis, we choose one representative distribution and plot an axis parallel slice for through the location of the steepest gradient, choosing the slice orthogonal to the smallest component of the gradient.

### Discretization error due to undersampling

First we assess the discretization error due to undersampling the exact distribution. When setting the initial condition of the numerical solution we have the choice to set the numerical concentration of each voxel to the average of the exact concentration integrated over the voxel, or to set the numerical concentration of each voxel to the exact concentration sampled at a single point e.g. the center of the voxel.

We set the initial condition of the numerical solution employing the first method, thereby ensuring that the average concentration (i.e. total number of molecules) introduced into the numerical simulation matches the average concentration in the exact solution.

**Supplementary Figure 17** shows the distribution of the error for  $n = 40$  different concentration distributions for a range of grid resolutions. The error of the numerical solution is measured in the  $L_\infty$ -norm thus capturing effects such as anisotropic diffusion due to discretization artifacts. We scale the  $L_\infty$ -norm by the exact value of the concentration at the point at which the absolute differences between exact and numeric concentration is maximal. The discretization converges to the exact solution, as expected. This however, merely shows the correct setting of the initial conditions.

In **Supplementary Figure 18** we observe the relation between the maximal observed error and the maximal discretized gradient. Each Line in the figure connects the same concentration distribution observed at different resolutions. The lowest grid resolutions are unable to capture the actual gradients, which leads to the increase of the observed gradient for a given distribution.

### Discretization error of the numerical solution

**Supplementary Figure 18** shows the time course of the  $L_\infty$  error for  $n = 40$  different initial conditions for grid resolutions ranging from 6 to 48 voxels. The qualitative behaviour of the error does not depend on the grid resolution. We observe convergence of the error with decreasing voxel size. The fast decay of the error by an order of magnitude within the first two seconds of the simulation is due to the fast decay of high frequency modes in diffusive processes. The frequencies  $i, j, k$  enter the time dependent factor  $T(t)$  of



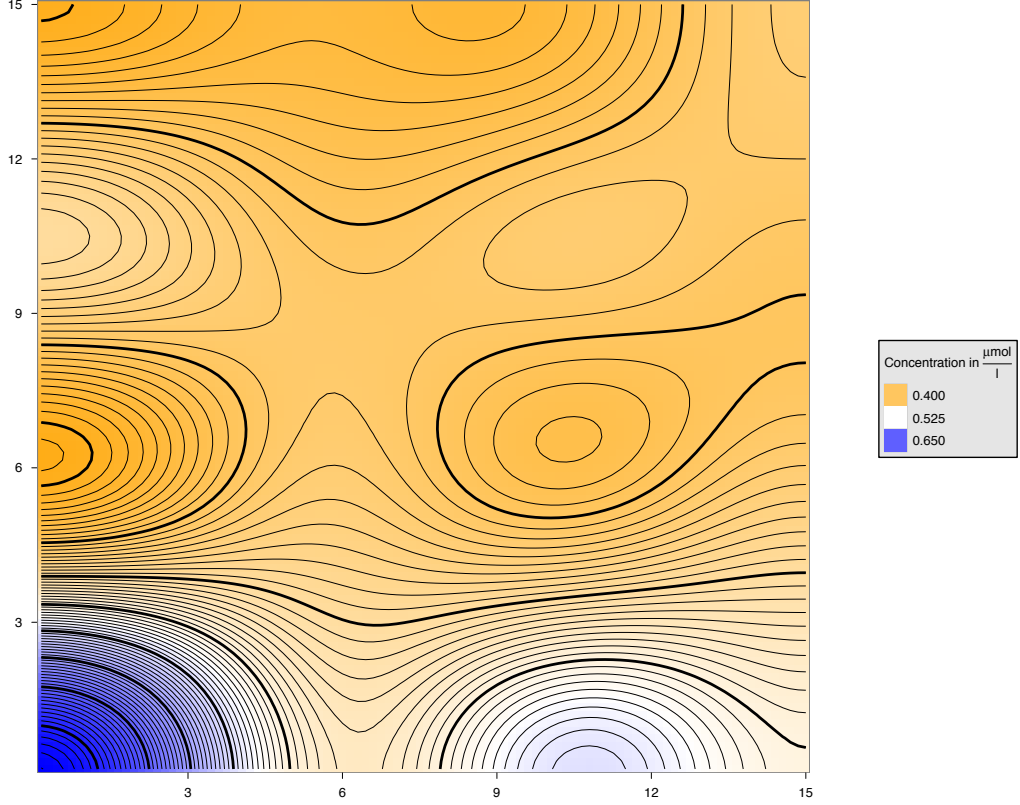

Supplementary Figure 16: Visualization of a concentration distribution in the plane containing the maximum in plane gradient. The concentrations are color coded as indicated in the figure legend, lines indicate locations of equal concentrations. Thick lines are plotted at intervals of  $50 \text{ nmol/l}$ , thin lines at intervals of  $5 \text{ nmol/l}$ .

the solution of the diffusion equation (2) quadratically

$$T(t) = \exp \left( -Dt \left( \left( \frac{i\pi}{L} \right)^2 + \left( \frac{j\pi}{L} \right)^2 + \left( \frac{k\pi}{L} \right)^2 \right) \right). \quad (2)$$

The high frequency terms of the initial discretization error decay together with the high frequency terms of the solution.

The error increases over the next few seconds before decaying with the expected suppression  $\propto \exp(-t)$ . This is due to low frequency error modes that stem from the anisotropy of the discretized laplacian, and lead to slower diffusion near concentration extrema, as can be seen in **Supplementary Figure 20**. However, even for very low diffusion constants of  $D = 10^{-12} \frac{\text{m}^2}{\text{s}}$  and coarse discretizations with voxel sizes on the order of one micron the relative error decays to values below  $10^{-3}$  within  $10 \text{ s}$ .

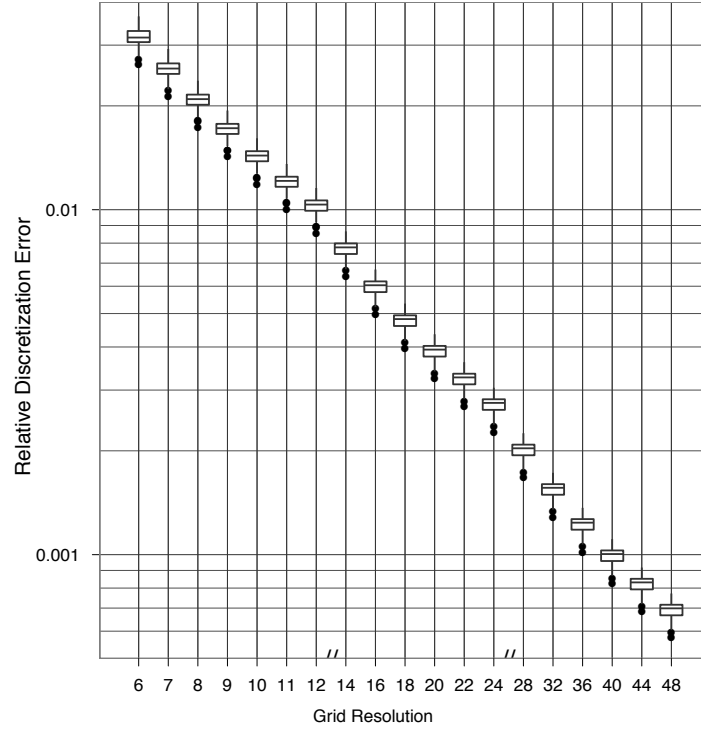

Supplementary Figure 17: Distribution of relative  $L_\infty$ -errors at  $t = 0$ . Boxes show the 1<sup>st</sup>, 2<sup>nd</sup>, 3<sup>rd</sup> quartile, whiskers extend  $3/2$  interquartile ranges ( $n = 40$ ).

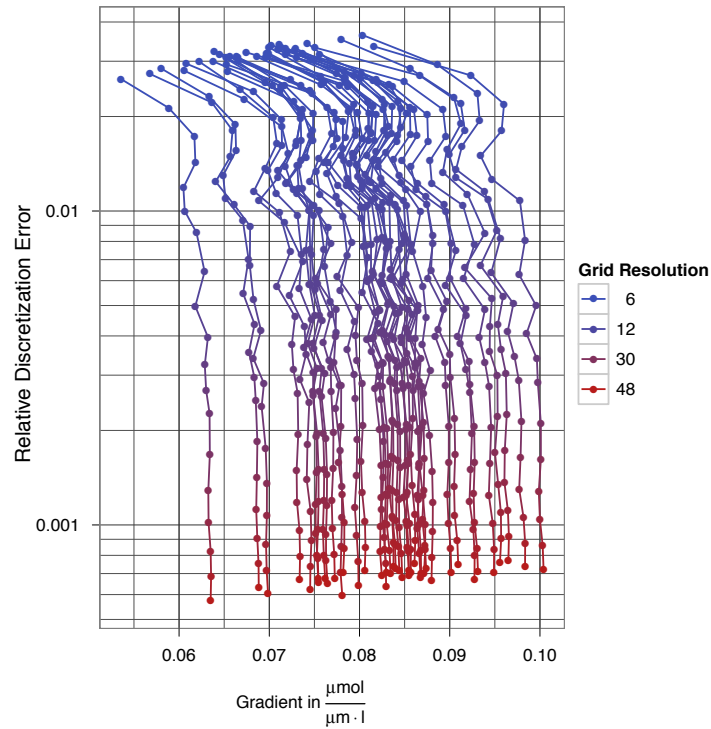

Supplementary Figure 18: Relationship between the discretization error and gradient strength. Values corresponding to the same set of coefficients  $a_{ijk}$  are connected by lines to improve readability.

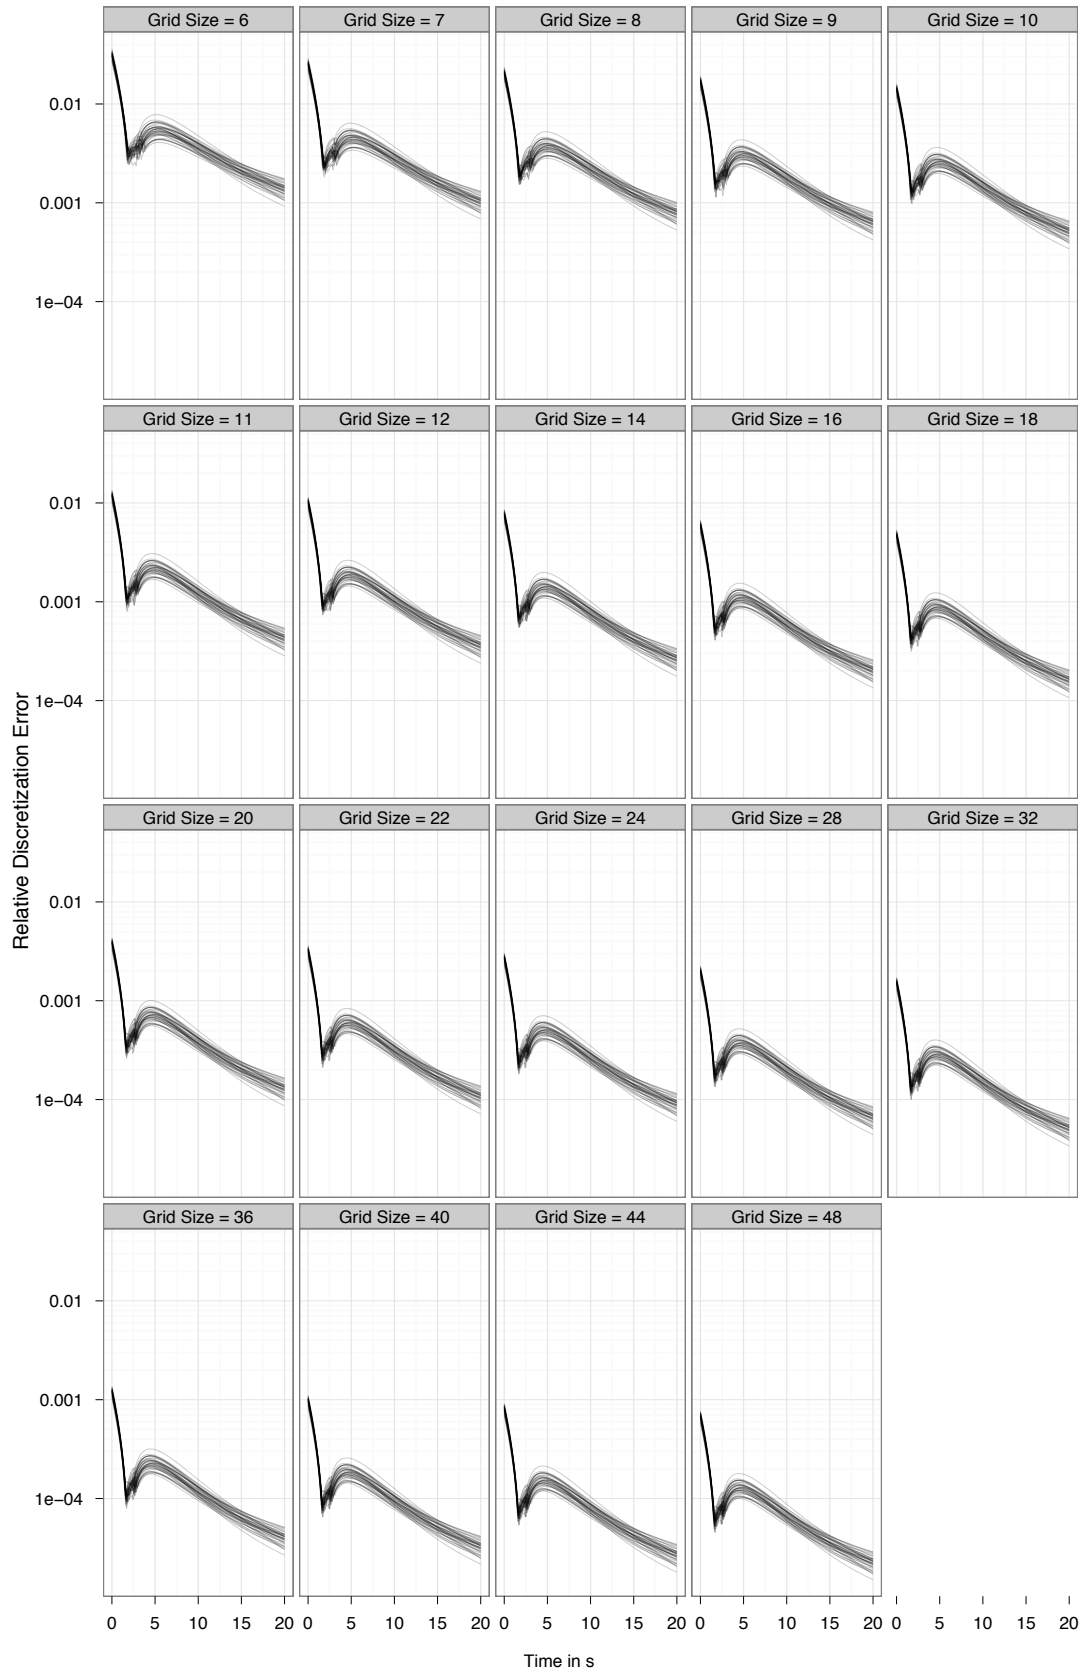

Supplementary Figure 19: Time course of the  $L_\infty$  error for  $n = 40$  random initial concentration distributions for grid resolutions ranging from 6 to 48 voxels.

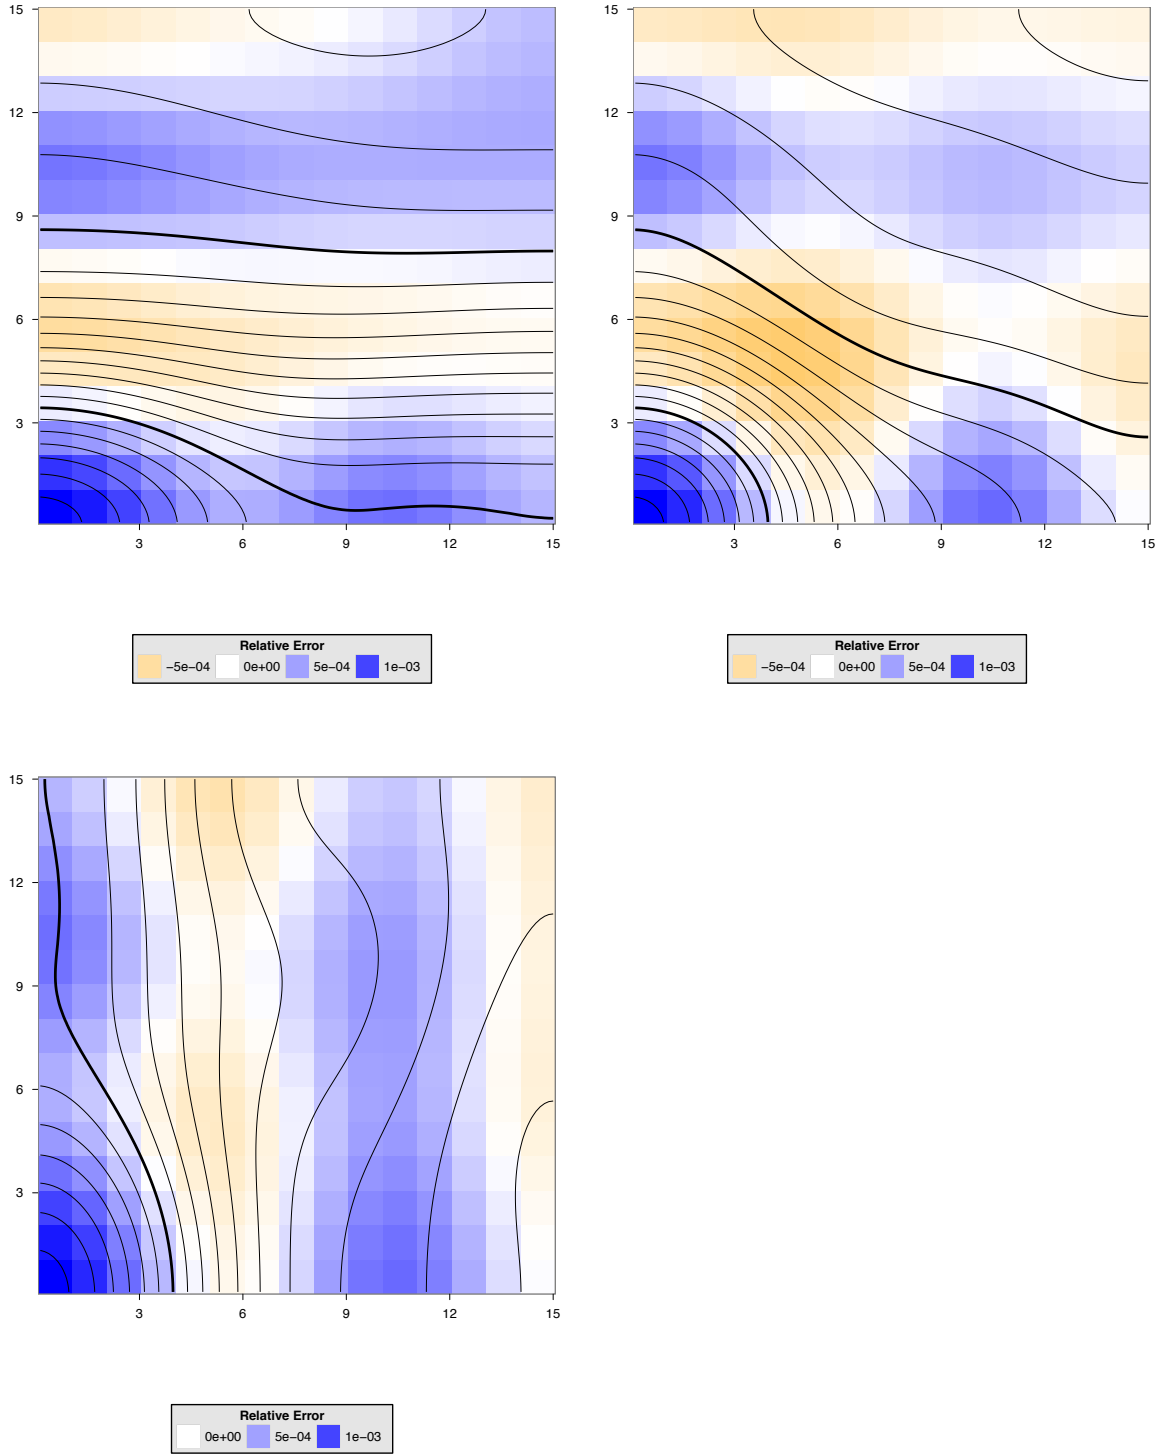

Supplementary Figure 20: Visualization of the relative  $L_\infty$  error at  $t = 5$  s using voxels with a side length of  $1 \mu m$ . The relative  $L_\infty$  error is color coded as indicated in the figure legend, lines indicate locations of equal concentrations. Thick lines are plotted at intervals of  $50 \text{ nmol/l}$ , thin lines at intervals of  $5 \text{ nmol/l}$ . The first panel corresponds to the slice orientation displayed in figure 16.
